# Supplementary material for: Evaluation of the Clinical, Biochemical, Genotype, and Prognosis of Propionic Acidemia in 133 Patients from China
Source: Research Square preprint supplement (doi:10.21203/rs.3.rs-3819961/v1), 2024-01-16
Supplement: Supplementary file 1 [file 25c0c5df72b56ebb4defe108.xlsx]

## Sheet: Sheet1
# Job ID:01e41172-879d-43e0-9f2e-e0dab39bbd5f
# Metadata: variantvalidator_version: 2.1.1.dev78+ga33bfe3, variantvalidator_hgvs_version: 2.2.1.dev0+g69b1a7c.d20230119, vvta_version: vvta_2022_11_1, vvseqrepo_db: VV_SR_2022_11/master, vvdb_version: vvdb_2022_11, options: transcript|genomic|protein|refseqgene|lrg|vcf|gene_info|tx_name|alt_loci
Input	Warnings	Select transcript	HGVS_transcript	HGVS_intronic_chr_context	HGVS_intronic_rsg_context	HGVS_RefSeqGene	HGVS_LRG	HGVS_LRG_transcript	HGVS_Predicted_Protein	HGVS_Genomic_GRCh37	HGVS_Genomic_GRCh38	GRCh37_CHR	GRCh37_POS	GRCh37_ID	GRCh37_REF	GRCh37_ALT	GRCh38_CHR	GRCh38_POS	GRCh38_ID	GRCh38_REF	GRCh38_ALT	Gene_Symbol	HGNC_Gene_ID	Transcript_description	Alt_genomic_loci
NM_000532.5:c.-2A>G		MANE	NM_000532.5:c.-2A>G			NG_008939.1:g.5050A>G			NP_000523.2:p.?	NC_000003.11:g.135969216A>G	NC_000003.12:g.136250374A>G	3	135969216	.	A	G	3	136250374	.	A	G	PCCB	HGNC:8654	Homo sapiens propionyl-CoA carboxylase subunit beta (PCCB), transcript variant 1, mRNA; nuclear gene for mitochondrial product
NM_000532.5:c.2T>C		MANE	NM_000532.5:c.2T>C			NG_008939.1:g.5053T>C			NP_000523.2:p.(Met1?)	NC_000003.11:g.135969219T>C	NC_000003.12:g.136250377T>C	3	135969219	.	T	C	3	136250377	.	T	C	PCCB	HGNC:8654	Homo sapiens propionyl-CoA carboxylase subunit beta (PCCB), transcript variant 1, mRNA; nuclear gene for mitochondrial product
NM_000532.5:c.31_40del		MANE	NM_000532.5:c.31_40del			NG_008939.1:g.5082_5091del			NP_000523.2:p.(Gly11SerfsTer51)	NC_000003.11:g.135969248_135969257del	NC_000003.12:g.136250406_136250415del	3	135969246	.	TCGGGGCAAGG	T	3	136250404	.	TCGGGGCAAGG	T	PCCB	HGNC:8654	Homo sapiens propionyl-CoA carboxylase subunit beta (PCCB), transcript variant 1, mRNA; nuclear gene for mitochondrial product
NM_000532.5:c.146del		MANE	NM_000532.5:c.146del			NG_008939.1:g.5197del			NP_000523.2:p.(Gly49GlufsTer16)	NC_000003.11:g.135969363del	NC_000003.12:g.136250521del	3	135969360	.	TG	T	3	136250518	.	TG	T	PCCB	HGNC:8654	Homo sapiens propionyl-CoA carboxylase subunit beta (PCCB), transcript variant 1, mRNA; nuclear gene for mitochondrial product
NM_000532.5:c.167_179delinsC		MANE	NM_000532.5:c.167_179delinsC			NG_008939.1:g.5218_5230delinsC			NP_000523.2:p.(Asp56_Lys60delinsAla)	NC_000003.11:g.135969384_135969396delinsC	NC_000003.12:g.136250542_136250554delinsC	3	135969384	.	ACGCGCAGCACAA	C	3	136250542	.	ACGCGCAGCACAA	C	PCCB	HGNC:8654	Homo sapiens propionyl-CoA carboxylase subunit beta (PCCB), transcript variant 1, mRNA; nuclear gene for mitochondrial product
NM_000532.5:c.168_179del		MANE	NM_000532.5:c.168_179del			NG_008939.1:g.5219_5230del			NP_000523.2:p.(Asp56_Lys60delinsGlu)	NC_000003.11:g.135969385_135969396del	NC_000003.12:g.136250543_136250554del	3	135969383	.	GACGCGCAGCACA	G	3	136250541	.	GACGCGCAGCACA	G	PCCB	HGNC:8654	Homo sapiens propionyl-CoA carboxylase subunit beta (PCCB), transcript variant 1, mRNA; nuclear gene for mitochondrial product
NM_000532.5:c.184-2A>G		MANE	NM_000532.5:c.184-2A>G	NC_000003.11(NM_000532.5):c.184-2A>G	NG_008939.1(NM_000532.5):c.184-2A>G	NG_008939.1:g.10530A>G			NP_000523.2:p.?	NC_000003.11:g.135974696A>G	NC_000003.12:g.136255854A>G	3	135974696	.	A	G	3	136255854	.	A	G	PCCB	HGNC:8654	Homo sapiens propionyl-CoA carboxylase subunit beta (PCCB), transcript variant 1, mRNA; nuclear gene for mitochondrial product
NM_000532.5:c.223G>C		MANE	NM_000532.5:c.223G>C			NG_008939.1:g.10571G>C			NP_000523.2:p.(Asp75His)	NC_000003.11:g.135974737G>C	NC_000003.12:g.136255895G>C	3	135974737	.	G	C	3	136255895	.	G	C	PCCB	HGNC:8654	Homo sapiens propionyl-CoA carboxylase subunit beta (PCCB), transcript variant 1, mRNA; nuclear gene for mitochondrial product
NM_000532.5:c.224A>C		MANE	NM_000532.5:c.224A>C			NG_008939.1:g.10572A>C			NP_000523.2:p.(Asp75Ala)	NC_000003.11:g.135974738A>C	NC_000003.12:g.136255896A>C	3	135974738	.	A	C	3	136255896	.	A	C	PCCB	HGNC:8654	Homo sapiens propionyl-CoA carboxylase subunit beta (PCCB), transcript variant 1, mRNA; nuclear gene for mitochondrial product
NM_000532.5:c.331C>T		MANE	NM_000532.5:c.331C>T			NG_008939.1:g.11258C>T			NP_000523.2:p.(Arg111Ter)	NC_000003.11:g.135975424C>T	NC_000003.12:g.136256582C>T	3	135975424	.	C	T	3	136256582	.	C	T	PCCB	HGNC:8654	Homo sapiens propionyl-CoA carboxylase subunit beta (PCCB), transcript variant 1, mRNA; nuclear gene for mitochondrial product
NM_000532.5:c.337C>T		MANE	NM_000532.5:c.337C>T			NG_008939.1:g.11264C>T			NP_000523.2:p.(Arg113Ter)	NC_000003.11:g.135975430C>T	NC_000003.12:g.136256588C>T	3	135975430	.	C	T	3	136256588	.	C	T	PCCB	HGNC:8654	Homo sapiens propionyl-CoA carboxylase subunit beta (PCCB), transcript variant 1, mRNA; nuclear gene for mitochondrial product
NM_000532.5:c.369_372del		MANE	NM_000532.5:c.369_372del			NG_008939.1:g.11296_11299del			NP_000523.2:p.(Ser123ArgfsTer26)	NC_000003.11:g.135975462_135975465del	NC_000003.12:g.136256620_136256623del	3	135975457	.	TTCAG	T	3	136256615	.	TTCAG	T	PCCB	HGNC:8654	Homo sapiens propionyl-CoA carboxylase subunit beta (PCCB), transcript variant 1, mRNA; nuclear gene for mitochondrial product
NM_000532.5:c.370C>T		MANE	NM_000532.5:c.370C>T			NG_008939.1:g.11297C>T			NP_000523.2:p.(Gln124Ter)	NC_000003.11:g.135975463C>T	NC_000003.12:g.136256621C>T	3	135975463	.	C	T	3	136256621	.	C	T	PCCB	HGNC:8654	Homo sapiens propionyl-CoA carboxylase subunit beta (PCCB), transcript variant 1, mRNA; nuclear gene for mitochondrial product
NM_000532.5:c.366_372+7del		MANE	NM_000532.5:c.366_372+7del	NC_000003.11(NM_000532.5):c.366_372+7del	NG_008939.1(NM_000532.5):c.366_372+7del	NG_008939.1:g.11293_11306del			NP_000523.2:p.?	NC_000003.11:g.135975459_135975472del	NC_000003.12:g.136256617_136256630del	3	135975458	.	TCAGTCAGGTATTTC	T	3	136256616	.	TCAGTCAGGTATTTC	T	PCCB	HGNC:8654	Homo sapiens propionyl-CoA carboxylase subunit beta (PCCB), transcript variant 1, mRNA; nuclear gene for mitochondrial product
NM_000532.5:c.391G>C		MANE	NM_000532.5:c.391G>C			NG_008939.1:g.15173G>C			NP_000523.2:p.(Gly131Arg)	NC_000003.11:g.135979339G>C	NC_000003.12:g.136260497G>C	3	135979339	.	G	C	3	136260497	.	G	C	PCCB	HGNC:8654	Homo sapiens propionyl-CoA carboxylase subunit beta (PCCB), transcript variant 1, mRNA; nuclear gene for mitochondrial product
NM_000532.5:c.428A>T		MANE	NM_000532.5:c.428A>T			NG_008939.1:g.15210A>T			NP_000523.2:p.(Lys143Ile)	NC_000003.11:g.135979376A>T	NC_000003.12:g.136260534A>T	3	135979376	.	A	T	3	136260534	.	A	T	PCCB	HGNC:8654	Homo sapiens propionyl-CoA carboxylase subunit beta (PCCB), transcript variant 1, mRNA; nuclear gene for mitochondrial product
NM_000532.5:c.429+5G>A		MANE	NM_000532.5:c.429+5G>A	NC_000003.11(NM_000532.5):c.429+5G>A	NG_008939.1(NM_000532.5):c.429+5G>A	NG_008939.1:g.15216G>A			NP_000523.2:p.?	NC_000003.11:g.135979382G>A	NC_000003.12:g.136260540G>A	3	135979382	.	G	A	3	136260540	.	G	A	PCCB	HGNC:8654	Homo sapiens propionyl-CoA carboxylase subunit beta (PCCB), transcript variant 1, mRNA; nuclear gene for mitochondrial product
NM_000532.5:c.553dup		MANE	NM_000532.5:c.553dup			NG_008939.1:g.38522dup			NP_000523.2:p.(Thr185AsnfsTer45)	NC_000003.11:g.136002688dup	NC_000003.12:g.136283846dup	3	136002687	.	T	TA	3	136283845	.	T	TA	PCCB	HGNC:8654	Homo sapiens propionyl-CoA carboxylase subunit beta (PCCB), transcript variant 1, mRNA; nuclear gene for mitochondrial product
NM_000532.5:c.562G>A		MANE	NM_000532.5:c.562G>A			NG_008939.1:g.38531G>A			NP_000523.2:p.(Gly188Arg)	NC_000003.11:g.136002697G>A	NC_000003.12:g.136283855G>A	3	136002697	.	G	A	3	136283855	.	G	A	PCCB	HGNC:8654	Homo sapiens propionyl-CoA carboxylase subunit beta (PCCB), transcript variant 1, mRNA; nuclear gene for mitochondrial product
NM_000532.5:c.605G>A		MANE	NM_000532.5:c.605G>A			NG_008939.1:g.38574G>A			NP_000523.2:p.(Gly202Asp)	NC_000003.11:g.136002740G>A	NC_000003.12:g.136283898G>A	3	136002740	.	G	A	3	136283898	.	G	A	PCCB	HGNC:8654	Homo sapiens propionyl-CoA carboxylase subunit beta (PCCB), transcript variant 1, mRNA; nuclear gene for mitochondrial product
NM_000532.5:c.634G>T		MANE	NM_000532.5:c.634G>T			NG_008939.1:g.38603G>T			NP_000523.2:p.(Asp212Tyr)	NC_000003.11:g.136002769G>T	NC_000003.12:g.136283927G>T	3	136002769	.	G	T	3	136283927	.	G	T	PCCB	HGNC:8654	Homo sapiens propionyl-CoA carboxylase subunit beta (PCCB), transcript variant 1, mRNA; nuclear gene for mitochondrial product
NM_000532.5:c.647T>C		MANE	NM_000532.5:c.647T>C			NG_008939.1:g.38616T>C			NP_000523.2:p.(Met216Thr)	NC_000003.11:g.136002782T>C	NC_000003.12:g.136283940T>C	3	136002782	.	T	C	3	136283940	.	T	C	PCCB	HGNC:8654	Homo sapiens propionyl-CoA carboxylase subunit beta (PCCB), transcript variant 1, mRNA; nuclear gene for mitochondrial product
NM_000532.5:c.733G>A		MANE	NM_000532.5:c.733G>A			NG_008939.1:g.48510G>A			NP_000523.2:p.(Gly245Ser)	NC_000003.11:g.136012676G>A	NC_000003.12:g.136293834G>A	3	136012676	.	G	A	3	136293834	.	G	A	PCCB	HGNC:8654	Homo sapiens propionyl-CoA carboxylase subunit beta (PCCB), transcript variant 1, mRNA; nuclear gene for mitochondrial product
NM_000532.5:c.763+1G>A		MANE	NM_000532.5:c.763+1G>A	NC_000003.11(NM_000532.5):c.763+1G>A	NG_008939.1(NM_000532.5):c.763+1G>A	NG_008939.1:g.48541G>A			NP_000523.2:p.?	NC_000003.11:g.136012707G>A	NC_000003.12:g.136293865G>A	3	136012707	.	G	A	3	136293865	.	G	A	PCCB	HGNC:8654	Homo sapiens propionyl-CoA carboxylase subunit beta (PCCB), transcript variant 1, mRNA; nuclear gene for mitochondrial product
NM_000532.5:c.838dup		MANE	NM_000532.5:c.838dup			NG_008939.1:g.52702dup			NP_000523.2:p.(Leu280ProfsTer11)	NC_000003.11:g.136016868dup	NC_000003.12:g.136298026dup	3	136016864	.	G	GC	3	136298022	.	G	GC	PCCB	HGNC:8654	Homo sapiens propionyl-CoA carboxylase subunit beta (PCCB), transcript variant 1, mRNA; nuclear gene for mitochondrial product
NM_000532.5:c.839dup		MANE	NM_000532.5:c.839dup			NG_008939.1:g.52703dup			NP_000523.2:p.(Ser281GlufsTer10)	NC_000003.11:g.136016869dup	NC_000003.12:g.136298027dup	3	136016868	.	C	CT	3	136298026	.	C	CT	PCCB	HGNC:8654	Homo sapiens propionyl-CoA carboxylase subunit beta (PCCB), transcript variant 1, mRNA; nuclear gene for mitochondrial product
NM_000532.5:c.839del		MANE	NM_000532.5:c.839del			NG_008939.1:g.52703del			NP_000523.2:p.(Leu280ArgfsTer68)	NC_000003.11:g.136016869del	NC_000003.12:g.136298027del	3	136016868	.	CT	C	3	136298026	.	CT	C	PCCB	HGNC:8654	Homo sapiens propionyl-CoA carboxylase subunit beta (PCCB), transcript variant 1, mRNA; nuclear gene for mitochondrial product
NM_000532.5:c.866G>C		MANE	NM_000532.5:c.866G>C			NG_008939.1:g.52730G>C			NP_000523.2:p.(Arg289Pro)	NC_000003.11:g.136016896G>C	NC_000003.12:g.136298054G>C	3	136016896	.	G	C	3	136298054	.	G	C	PCCB	HGNC:8654	Homo sapiens propionyl-CoA carboxylase subunit beta (PCCB), transcript variant 1, mRNA; nuclear gene for mitochondrial product
NM_000532.5:c.967-2A>T		MANE	NM_000532.5:c.967-2A>T	NC_000003.11(NM_000532.5):c.967-2A>T	NG_008939.1(NM_000532.5):c.967-2A>T	NG_008939.1:g.71615A>T			NP_000523.2:p.?	NC_000003.11:g.136035781A>T	NC_000003.12:g.136316939A>T	3	136035781	.	A	T	3	136316939	.	A	T	PCCB	HGNC:8654	Homo sapiens propionyl-CoA carboxylase subunit beta (PCCB), transcript variant 1, mRNA; nuclear gene for mitochondrial product
NM_000532.5:c.967_969del	NM_000532.5:c.967_969del automapped to NM_000532.5:c.971_973delTTG	MANE	NM_000532.5:c.971_973del			NG_008939.1:g.71621_71623del			NP_000523.2:p.(Val324del)	NC_000003.11:g.136035787_136035789del	NC_000003.12:g.136316945_136316947del	3	136035782	.	GGTT	G	3	136316940	.	GGTT	G	PCCB	HGNC:8654	Homo sapiens propionyl-CoA carboxylase subunit beta (PCCB), transcript variant 1, mRNA; nuclear gene for mitochondrial product
NM_000532.5:c.1028G>A		MANE	NM_000532.5:c.1028G>A			NG_008939.1:g.71678G>A			NP_000523.2:p.(Gly343Asp)	NC_000003.11:g.136035844G>A	NC_000003.12:g.136317002G>A	3	136035844	.	G	A	3	136317002	.	G	A	PCCB	HGNC:8654	Homo sapiens propionyl-CoA carboxylase subunit beta (PCCB), transcript variant 1, mRNA; nuclear gene for mitochondrial product
NM_000532.5:c.1076C>T		MANE	NM_000532.5:c.1076C>T			NG_008939.1:g.71726C>T			NP_000523.2:p.(Pro359Leu)	NC_000003.11:g.136035892C>T	NC_000003.12:g.136317050C>T	3	136035892	.	C	T	3	136317050	.	C	T	PCCB	HGNC:8654	Homo sapiens propionyl-CoA carboxylase subunit beta (PCCB), transcript variant 1, mRNA; nuclear gene for mitochondrial product
NM_000532.5:c.1087T>C		MANE	NM_000532.5:c.1087T>C			NG_008939.1:g.71737T>C			NP_000523.2:p.(Ser363Pro)	NC_000003.11:g.136035903T>C	NC_000003.12:g.136317061T>C	3	136035903	.	T	C	3	136317061	.	T	C	PCCB	HGNC:8654	Homo sapiens propionyl-CoA carboxylase subunit beta (PCCB), transcript variant 1, mRNA; nuclear gene for mitochondrial product
NM_000532.5:c.1091-2A>G		MANE	NM_000532.5:c.1091-2A>G	NC_000003.11(NM_000532.5):c.1091-2A>G	NG_008939.1(NM_000532.5):c.1091-2A>G	NG_008939.1:g.81477A>G			NP_000523.2:p.?	NC_000003.11:g.136045643A>G	NC_000003.12:g.136326801A>G	3	136045643	.	A	G	3	136326801	.	A	G	PCCB	HGNC:8654	Homo sapiens propionyl-CoA carboxylase subunit beta (PCCB), transcript variant 1, mRNA; nuclear gene for mitochondrial product
NM_000532.5:c.1108T>C		MANE	NM_000532.5:c.1108T>C			NG_008939.1:g.81496T>C			NP_000523.2:p.(Ser370Pro)	NC_000003.11:g.136045662T>C	NC_000003.12:g.136326820T>C	3	136045662	.	T	C	3	136326820	.	T	C	PCCB	HGNC:8654	Homo sapiens propionyl-CoA carboxylase subunit beta (PCCB), transcript variant 1, mRNA; nuclear gene for mitochondrial product
NM_000532.5:c.1112C>T		MANE	NM_000532.5:c.1112C>T			NG_008939.1:g.81500C>T			NP_000523.2:p.(Ser371Phe)	NC_000003.11:g.136045666C>T	NC_000003.12:g.136326824C>T	3	136045666	.	C	T	3	136326824	.	C	T	PCCB	HGNC:8654	Homo sapiens propionyl-CoA carboxylase subunit beta (PCCB), transcript variant 1, mRNA; nuclear gene for mitochondrial product
NM_000532.5:c.1150T>G		MANE	NM_000532.5:c.1150T>G			NG_008939.1:g.81538T>G			NP_000523.2:p.(Phe384Val)	NC_000003.11:g.136045704T>G	NC_000003.12:g.136326862T>G	3	136045704	.	T	G	3	136326862	.	T	G	PCCB	HGNC:8654	Homo sapiens propionyl-CoA carboxylase subunit beta (PCCB), transcript variant 1, mRNA; nuclear gene for mitochondrial product
NM_000532.5:c.1174G>A		MANE	NM_000532.5:c.1174G>A			NG_008939.1:g.81562G>A			NP_000523.2:p.(Val392Ile)	NC_000003.11:g.136045728G>A	NC_000003.12:g.136326886G>A	3	136045728	.	G	A	3	136326886	.	G	A	PCCB	HGNC:8654	Homo sapiens propionyl-CoA carboxylase subunit beta (PCCB), transcript variant 1, mRNA; nuclear gene for mitochondrial product
NM_000532.5:c.1196C>G		MANE	NM_000532.5:c.1196C>G			NG_008939.1:g.81584C>G			NP_000523.2:p.(Pro399Arg)	NC_000003.11:g.136045750C>G	NC_000003.12:g.136326908C>G	3	136045750	.	C	G	3	136326908	.	C	G	PCCB	HGNC:8654	Homo sapiens propionyl-CoA carboxylase subunit beta (PCCB), transcript variant 1, mRNA; nuclear gene for mitochondrial product
NM_000532.5:c.1220del		MANE	NM_000532.5:c.1220del			NG_008939.1:g.81852del			NP_000523.2:p.(Gly407AlafsTer36)	NC_000003.11:g.136046018del	NC_000003.12:g.136327176del	3	136046013	.	CG	C	3	136327171	.	CG	C	PCCB	HGNC:8654	Homo sapiens propionyl-CoA carboxylase subunit beta (PCCB), transcript variant 1, mRNA; nuclear gene for mitochondrial product
NM_000532.5:c.1228C>T		MANE	NM_000532.5:c.1228C>T			NG_008939.1:g.81860C>T			NP_000523.2:p.(Arg410Trp)	NC_000003.11:g.136046026C>T	NC_000003.12:g.136327184C>T	3	136046026	.	C	T	3	136327184	.	C	T	PCCB	HGNC:8654	Homo sapiens propionyl-CoA carboxylase subunit beta (PCCB), transcript variant 1, mRNA; nuclear gene for mitochondrial product
NM_000532.5:c.1229G>A		MANE	NM_000532.5:c.1229G>A			NG_008939.1:g.81861G>A			NP_000523.2:p.(Arg410Gln)	NC_000003.11:g.136046027G>A	NC_000003.12:g.136327185G>A	3	136046027	.	G	A	3	136327185	.	G	A	PCCB	HGNC:8654	Homo sapiens propionyl-CoA carboxylase subunit beta (PCCB), transcript variant 1, mRNA; nuclear gene for mitochondrial product
NM_000532.5:c.1234G>C		MANE	NM_000532.5:c.1234G>C			NG_008939.1:g.81866G>C			NP_000523.2:p.(Gly412Arg)	NC_000003.11:g.136046032G>C	NC_000003.12:g.136327190G>C	3	136046032	.	G	C	3	136327190	.	G	C	PCCB	HGNC:8654	Homo sapiens propionyl-CoA carboxylase subunit beta (PCCB), transcript variant 1, mRNA; nuclear gene for mitochondrial product
NM_000532.5:c.1244T>C		MANE	NM_000532.5:c.1244T>C			NG_008939.1:g.81876T>C			NP_000523.2:p.(Leu415Pro)	NC_000003.11:g.136046042T>C	NC_000003.12:g.136327200T>C	3	136046042	.	T	C	3	136327200	.	T	C	PCCB	HGNC:8654	Homo sapiens propionyl-CoA carboxylase subunit beta (PCCB), transcript variant 1, mRNA; nuclear gene for mitochondrial product
NM_000532.5:c.1253C>T		MANE	NM_000532.5:c.1253C>T			NG_008939.1:g.81885C>T			NP_000523.2:p.(Ala418Val)	NC_000003.11:g.136046051C>T	NC_000003.12:g.136327209C>T	3	136046051	.	C	T	3	136327209	.	C	T	PCCB	HGNC:8654	Homo sapiens propionyl-CoA carboxylase subunit beta (PCCB), transcript variant 1, mRNA; nuclear gene for mitochondrial product
NM_000532.5:c.1267A>C		MANE	NM_000532.5:c.1267A>C			NG_008939.1:g.81899A>C			NP_000523.2:p.(Thr423Pro)	NC_000003.11:g.136046065A>C	NC_000003.12:g.136327223A>C	3	136046065	.	A	C	3	136327223	.	A	C	PCCB	HGNC:8654	Homo sapiens propionyl-CoA carboxylase subunit beta (PCCB), transcript variant 1, mRNA; nuclear gene for mitochondrial product
NM_000532.5:c.1274C>G		MANE	NM_000532.5:c.1274C>G			NG_008939.1:g.81906C>G			NP_000523.2:p.(Pro425Arg)	NC_000003.11:g.136046072C>G	NC_000003.12:g.136327230C>G	3	136046072	.	C	G	3	136327230	.	C	G	PCCB	HGNC:8654	Homo sapiens propionyl-CoA carboxylase subunit beta (PCCB), transcript variant 1, mRNA; nuclear gene for mitochondrial product
NM_000532.5:c.1283C>T		MANE	NM_000532.5:c.1283C>T			NG_008939.1:g.81915C>T			NP_000523.2:p.(Thr428Ile)	NC_000003.11:g.136046081C>T	NC_000003.12:g.136327239C>T	3	136046081	.	C	T	3	136327239	.	C	T	PCCB	HGNC:8654	Homo sapiens propionyl-CoA carboxylase subunit beta (PCCB), transcript variant 1, mRNA; nuclear gene for mitochondrial product
NM_000532.5:c.1301C>T		MANE	NM_000532.5:c.1301C>T			NG_008939.1:g.82311C>T			NP_000523.2:p.(Ala434Val)	NC_000003.11:g.136046477C>T	NC_000003.12:g.136327635C>T	3	136046477	.	C	T	3	136327635	.	C	T	PCCB	HGNC:8654	Homo sapiens propionyl-CoA carboxylase subunit beta (PCCB), transcript variant 1, mRNA; nuclear gene for mitochondrial product
NM_000532.5:c.1313C>T		MANE	NM_000532.5:c.1313C>T			NG_008939.1:g.82323C>T			NP_000523.2:p.(Ala438Val)	NC_000003.11:g.136046489C>T	NC_000003.12:g.136327647C>T	3	136046489	.	C	T	3	136327647	.	C	T	PCCB	HGNC:8654	Homo sapiens propionyl-CoA carboxylase subunit beta (PCCB), transcript variant 1, mRNA; nuclear gene for mitochondrial product
NM_000532.5:c.1316A>G		MANE	NM_000532.5:c.1316A>G			NG_008939.1:g.82326A>G			NP_000523.2:p.(Tyr439Cys)	NC_000003.11:g.136046492A>G	NC_000003.12:g.136327650A>G	3	136046492	.	A	G	3	136327650	.	A	G	PCCB	HGNC:8654	Homo sapiens propionyl-CoA carboxylase subunit beta (PCCB), transcript variant 1, mRNA; nuclear gene for mitochondrial product
NM_000532.5:c.1329C>G		MANE	NM_000532.5:c.1329C>G			NG_008939.1:g.82339C>G			NP_000523.2:p.(Ser443Arg)	NC_000003.11:g.136046505C>G	NC_000003.12:g.136327663C>G	3	136046505	.	C	G	3	136327663	.	C	G	PCCB	HGNC:8654	Homo sapiens propionyl-CoA carboxylase subunit beta (PCCB), transcript variant 1, mRNA; nuclear gene for mitochondrial product
NM_000532.5:c.1339C>T		MANE	NM_000532.5:c.1339C>T			NG_008939.1:g.82349C>T			NP_000523.2:p.(Leu447Phe)	NC_000003.11:g.136046515C>T	NC_000003.12:g.136327673C>T	3	136046515	.	C	T	3	136327673	.	C	T	PCCB	HGNC:8654	Homo sapiens propionyl-CoA carboxylase subunit beta (PCCB), transcript variant 1, mRNA; nuclear gene for mitochondrial product
NM_000532.5:c.1373C>T		MANE	NM_000532.5:c.1373C>T			NG_008939.1:g.82383C>T			NP_000523.2:p.(Ala458Val)	NC_000003.11:g.136046549C>T	NC_000003.12:g.136327707C>T	3	136046549	.	C	T	3	136327707	.	C	T	PCCB	HGNC:8654	Homo sapiens propionyl-CoA carboxylase subunit beta (PCCB), transcript variant 1, mRNA; nuclear gene for mitochondrial product
NM_000532.5:c.1495C>T		MANE	NM_000532.5:c.1495C>T			NG_008939.1:g.83530C>T			NP_000523.2:p.(Arg499Ter)	NC_000003.11:g.136047696C>T	NC_000003.12:g.136328854C>T	3	136047696	.	C	T	3	136328854	.	C	T	PCCB	HGNC:8654	Homo sapiens propionyl-CoA carboxylase subunit beta (PCCB), transcript variant 1, mRNA; nuclear gene for mitochondrial product
NM_000532.5:c.1497A>G		MANE	NM_000532.5:c.1497A>G			NG_008939.1:g.83532A>G			NP_000523.2:p.(Arg499=)	NC_000003.11:g.136047698A>G	NC_000003.12:g.136328856A>G	3	136047698	.	A	G	3	136328856	.	A	G	PCCB	HGNC:8654	Homo sapiens propionyl-CoA carboxylase subunit beta (PCCB), transcript variant 1, mRNA; nuclear gene for mitochondrial product
NM_000532.5:c.1499-2A>G		MANE	NM_000532.5:c.1499-2A>G	NC_000003.11(NM_000532.5):c.1499-2A>G	NG_008939.1(NM_000532.5):c.1499-2A>G	NG_008939.1:g.84579A>G			NP_000523.2:p.?	NC_000003.11:g.136048745A>G	NC_000003.12:g.136329903A>G	3	136048745	.	A	G	3	136329903	.	A	G	PCCB	HGNC:8654	Homo sapiens propionyl-CoA carboxylase subunit beta (PCCB), transcript variant 1, mRNA; nuclear gene for mitochondrial product
NM_000532.5:c.1535G>A		MANE	NM_000532.5:c.1535G>A			NG_008939.1:g.84617G>A			NP_000523.2:p.(Arg512His)	NC_000003.11:g.136048783G>A	NC_000003.12:g.136329941G>A	3	136048783	.	G	A	3	136329941	.	G	A	PCCB	HGNC:8654	Homo sapiens propionyl-CoA carboxylase subunit beta (PCCB), transcript variant 1, mRNA; nuclear gene for mitochondrial product
NM_000532.5:c.1540C>T		MANE	NM_000532.5:c.1540C>T			NG_008939.1:g.84622C>T			NP_000523.2:p.(Arg514Ter)	NC_000003.11:g.136048788C>T	NC_000003.12:g.136329946C>T	3	136048788	.	C	T	3	136329946	.	C	T	PCCB	HGNC:8654	Homo sapiens propionyl-CoA carboxylase subunit beta (PCCB), transcript variant 1, mRNA; nuclear gene for mitochondrial product
NM_000532.5:c.1541G>C		MANE	NM_000532.5:c.1541G>C			NG_008939.1:g.84623G>C			NP_000523.2:p.(Arg514Pro)	NC_000003.11:g.136048789G>C	NC_000003.12:g.136329947G>C	3	136048789	.	G	C	3	136329947	.	G	C	PCCB	HGNC:8654	Homo sapiens propionyl-CoA carboxylase subunit beta (PCCB), transcript variant 1, mRNA; nuclear gene for mitochondrial product
NM_000532.5:c.1582C>T		MANE	NM_000532.5:c.1582C>T			NG_008939.1:g.84664C>T			NP_000523.2:p.(Gln528Ter)	NC_000003.11:g.136048830C>T	NC_000003.12:g.136329988C>T	3	136048830	.	C	T	3	136329988	.	C	T	PCCB	HGNC:8654	Homo sapiens propionyl-CoA carboxylase subunit beta (PCCB), transcript variant 1, mRNA; nuclear gene for mitochondrial product
NM_000532.5:c.1599A>C		MANE	NM_000532.5:c.1599A>C			NG_008939.1:g.84681A>C			NP_000523.2:p.(Lys533Asn)	NC_000003.11:g.136048847A>C	NC_000003.12:g.136330005A>C	3	136048847	.	A	C	3	136330005	.	A	C	PCCB	HGNC:8654	Homo sapiens propionyl-CoA carboxylase subunit beta (PCCB), transcript variant 1, mRNA; nuclear gene for mitochondrial product
NC_000003.11:g.(?_135969181)_(135969401_135974697)	Uncertain positions are not currently supported	None
NC_000003.11:g.(?_135969181)_(136016915_136019871)	Uncertain positions are not currently supported	None
