# Supplementary material for: Evaluation of the Clinical, Biochemical, Genotype, and Prognosis of Propionic Acidemia in 133 Patients from China
Source: Research Square preprint supplement (doi:10.21203/rs.3.rs-3819961/v1), 2024-01-16
Supplement: Supplementary file 2 [file bf306d7df9e380f6f4d53fa4.xlsx]

## Sheet: Sheet1
# Job ID:8ed78311-287c-4a11-b522-15d2b4b047ab
# Metadata: variantvalidator_version: 2.1.1.dev78+ga33bfe3, variantvalidator_hgvs_version: 2.2.1.dev0+g69b1a7c.d20230119, vvta_version: vvta_2022_11_1, vvseqrepo_db: VV_SR_2022_11/master, vvdb_version: vvdb_2022_11, options: transcript|genomic|protein|refseqgene|lrg|vcf|gene_info|tx_name|alt_loci
Input	Warnings	Select transcript	HGVS_transcript	HGVS_intronic_chr_context	HGVS_intronic_rsg_context	HGVS_RefSeqGene	HGVS_LRG	HGVS_LRG_transcript	HGVS_Predicted_Protein	HGVS_Genomic_GRCh37	HGVS_Genomic_GRCh38	GRCh37_CHR	GRCh37_POS	GRCh37_ID	GRCh37_REF	GRCh37_ALT	GRCh38_CHR	GRCh38_POS	GRCh38_ID	GRCh38_REF	GRCh38_ALT	Gene_Symbol	HGNC_Gene_ID	Transcript_description	Alt_genomic_loci
NM_000282.4:c.2T>A		MANE	NM_000282.4:c.2T>A			NG_008768.1:g.5040T>A			NP_000273.2:p.(Met1?)	NC_000013.10:g.100741376T>A	NC_000013.11:g.100089122T>A	13	100741376	.	T	A	13	100089122	.	T	A	PCCA	HGNC:8653	Homo sapiens propionyl-CoA carboxylase subunit alpha (PCCA), transcript variant 1, mRNA; nuclear gene for mitochondrial product
NM_000282.4:c.39del		MANE	NM_000282.4:c.39del			NG_008768.1:g.5077del			NP_000273.2:p.(Ala14ProfsTer12)	NC_000013.10:g.100741413del	NC_000013.11:g.100089159del	13	100741412	.	CT	C	13	100089158	.	CT	C	PCCA	HGNC:8653	Homo sapiens propionyl-CoA carboxylase subunit alpha (PCCA), transcript variant 1, mRNA; nuclear gene for mitochondrial product
NM_000282.4:c.43G>T		MANE	NM_000282.4:c.43G>T			NG_008768.1:g.5081G>T			NP_000273.2:p.(Gly15Ter)	NC_000013.10:g.100741417G>T	NC_000013.11:g.100089163G>T	13	100741417	.	G	T	13	100089163	.	G	T	PCCA	HGNC:8653	Homo sapiens propionyl-CoA carboxylase subunit alpha (PCCA), transcript variant 1, mRNA; nuclear gene for mitochondrial product
NM_000282.4:c.59G>A		MANE	NM_000282.4:c.59G>A			NG_008768.1:g.5097G>A			NP_000273.2:p.(Trp20Ter)	NC_000013.10:g.100741433G>A	NC_000013.11:g.100089179G>A	13	100741433	.	G	A	13	100089179	.	G	A	PCCA	HGNC:8653	Homo sapiens propionyl-CoA carboxylase subunit alpha (PCCA), transcript variant 1, mRNA; nuclear gene for mitochondrial product
NM_000282.4:c.106-2A>G		MANE	NM_000282.4:c.106-2A>G	NC_000013.10(NM_000282.4):c.106-2A>G	NG_008768.1(NM_000282.4):c.106-2A>G	NG_008768.1:g.18799A>G			NP_000273.2:p.?	NC_000013.10:g.100755135A>G	NC_000013.11:g.100102881A>G	13	100755135	.	A	G	13	100102881	.	A	G	PCCA	HGNC:8653	Homo sapiens propionyl-CoA carboxylase subunit alpha (PCCA), transcript variant 1, mRNA; nuclear gene for mitochondrial product
NM_000282.4:c.117C>G		MANE	NM_000282.4:c.117C>G			NG_008768.1:g.18812C>G			NP_000273.2:p.(Tyr39Ter)	NC_000013.10:g.100755148C>G	NC_000013.11:g.100102894C>G	13	100755148	.	C	G	13	100102894	.	C	G	PCCA	HGNC:8653	Homo sapiens propionyl-CoA carboxylase subunit alpha (PCCA), transcript variant 1, mRNA; nuclear gene for mitochondrial product
NM_000282.4:c.127C>T		MANE	NM_000282.4:c.127C>T			NG_008768.1:g.18822C>T			NP_000273.2:p.(Gln43Ter)	NC_000013.10:g.100755158C>T	NC_000013.11:g.100102904C>T	13	100755158	.	C	T	13	100102904	.	C	T	PCCA	HGNC:8653	Homo sapiens propionyl-CoA carboxylase subunit alpha (PCCA), transcript variant 1, mRNA; nuclear gene for mitochondrial product
NM_000282.4:c.131delinsATT		MANE	NM_000282.4:c.131delinsATT			NG_008768.1:g.18826delinsATT			NP_000273.2:p.(Cys44TyrfsTer3)	NC_000013.10:g.100755162delinsATT	NC_000013.11:g.100102908delinsATT	13	100755162	.	G	ATT	13	100102908	.	G	ATT	PCCA	HGNC:8653	Homo sapiens propionyl-CoA carboxylase subunit alpha (PCCA), transcript variant 1, mRNA; nuclear gene for mitochondrial product
NM_000282.4:c.151C>T		MANE	NM_000282.4:c.151C>T			NG_008768.1:g.18846C>T			NP_000273.2:p.(Leu51Phe)	NC_000013.10:g.100755182C>T	NC_000013.11:g.100102928C>T	13	100755182	.	C	T	13	100102928	.	C	T	PCCA	HGNC:8653	Homo sapiens propionyl-CoA carboxylase subunit alpha (PCCA), transcript variant 1, mRNA; nuclear gene for mitochondrial product
NM_000282.4:c.216del		MANE	NM_000282.4:c.216del			NG_008768.1:g.27791del			NP_000273.2:p.(Glu73LysfsTer31)	NC_000013.10:g.100764127del	NC_000013.11:g.100111873del	13	100764126	.	GA	G	13	100111872	.	GA	G	PCCA	HGNC:8653	Homo sapiens propionyl-CoA carboxylase subunit alpha (PCCA), transcript variant 1, mRNA; nuclear gene for mitochondrial product
NM_000282.4:c.229C>T		MANE	NM_000282.4:c.229C>T			NG_008768.1:g.27804C>T			NP_000273.2:p.(Arg77Trp)	NC_000013.10:g.100764140C>T	NC_000013.11:g.100111886C>T	13	100764140	.	C	T	13	100111886	.	C	T	PCCA	HGNC:8653	Homo sapiens propionyl-CoA carboxylase subunit alpha (PCCA), transcript variant 1, mRNA; nuclear gene for mitochondrial product
NM_000282.4:c.231+1G>A		MANE	NM_000282.4:c.231+1G>A	NC_000013.10(NM_000282.4):c.231+1G>A	NG_008768.1(NM_000282.4):c.231+1G>A	NG_008768.1:g.27807G>A			NP_000273.2:p.?	NC_000013.10:g.100764143G>A	NC_000013.11:g.100111889G>A	13	100764143	.	G	A	13	100111889	.	G	A	PCCA	HGNC:8653	Homo sapiens propionyl-CoA carboxylase subunit alpha (PCCA), transcript variant 1, mRNA; nuclear gene for mitochondrial product
NM_000282.4:c.289G>C		MANE	NM_000282.4:c.289G>C			NG_008768.1:g.27968G>C			NP_000273.2:p.(Asp97His)	NC_000013.10:g.100764304G>C	NC_000013.11:g.100112050G>C	13	100764304	.	G	C	13	100112050	.	G	C	PCCA	HGNC:8653	Homo sapiens propionyl-CoA carboxylase subunit alpha (PCCA), transcript variant 1, mRNA; nuclear gene for mitochondrial product
NM_000282.4:c.305del		MANE	NM_000282.4:c.305del			NG_008768.1:g.70901del			NP_000273.2:p.(His102LeufsTer2)	NC_000013.10:g.100807237del	NC_000013.11:g.100154983del	13	100807236	.	CA	C	13	100154982	.	CA	C	PCCA	HGNC:8653	Homo sapiens propionyl-CoA carboxylase subunit alpha (PCCA), transcript variant 1, mRNA; nuclear gene for mitochondrial product
NM_000282.4:c.317C>A		MANE	NM_000282.4:c.317C>A			NG_008768.1:g.70913C>A			NP_000273.2:p.(Ala106Glu)	NC_000013.10:g.100807249C>A	NC_000013.11:g.100154995C>A	13	100807249	.	C	A	13	100154995	.	C	A	PCCA	HGNC:8653	Homo sapiens propionyl-CoA carboxylase subunit alpha (PCCA), transcript variant 1, mRNA; nuclear gene for mitochondrial product
NM_000282.4:c.375_386del		MANE	NM_000282.4:c.375_386del			NG_008768.1:g.70971_70982del			NP_000273.2:p.(Asp125_Met128del)	NC_000013.10:g.100807307_100807318del	NC_000013.11:g.100155053_100155064del	13	100807300	.	ACATGGATGCCAT	A	13	100155046	.	ACATGGATGCCAT	A	PCCA	HGNC:8653	Homo sapiens propionyl-CoA carboxylase subunit alpha (PCCA), transcript variant 1, mRNA; nuclear gene for mitochondrial product
NM_000282.4:c.491T>C		MANE	NM_000282.4:c.491T>C			NG_008768.1:g.125272T>C			NP_000273.2:p.(Ile164Thr)	NC_000013.10:g.100861608T>C	NC_000013.11:g.100209354T>C	13	100861608	.	T	C	13	100209354	.	T	C	PCCA	HGNC:8653	Homo sapiens propionyl-CoA carboxylase subunit alpha (PCCA), transcript variant 1, mRNA; nuclear gene for mitochondrial product
NM_000282.4:c.497del		MANE	NM_000282.4:c.497del			NG_008768.1:g.125278del			NP_000273.2:p.(Pro166LeufsTer18)	NC_000013.10:g.100861614del	NC_000013.11:g.100209360del	13	100861612	.	AC	A	13	100209358	.	AC	A	PCCA	HGNC:8653	Homo sapiens propionyl-CoA carboxylase subunit alpha (PCCA), transcript variant 1, mRNA; nuclear gene for mitochondrial product
NM_000282.4:c.541A>C		MANE	NM_000282.4:c.541A>C			NG_008768.1:g.125322A>C			NP_000273.2:p.(Lys181Gln)	NC_000013.10:g.100861658A>C	NC_000013.11:g.100209404A>C	13	100861658	.	A	C	13	100209404	.	A	C	PCCA	HGNC:8653	Homo sapiens propionyl-CoA carboxylase subunit alpha (PCCA), transcript variant 1, mRNA; nuclear gene for mitochondrial product
NM_000282.4:c.596T>A		MANE	NM_000282.4:c.596T>A			NG_008768.1:g.125377T>A			NP_000273.2:p.(Val199Asp)	NC_000013.10:g.100861713T>A	NC_000013.11:g.100209459T>A	13	100861713	.	T	A	13	100209459	.	T	A	PCCA	HGNC:8653	Homo sapiens propionyl-CoA carboxylase subunit alpha (PCCA), transcript variant 1, mRNA; nuclear gene for mitochondrial product
NM_000282.4:c.683G>T		MANE	NM_000282.4:c.683G>T			NG_008768.1:g.173558G>T			NP_000273.2:p.(Gly228Val)	NC_000013.10:g.100909894G>T	NC_000013.11:g.100257640G>T	13	100909894	.	G	T	13	100257640	.	G	T	PCCA	HGNC:8653	Homo sapiens propionyl-CoA carboxylase subunit alpha (PCCA), transcript variant 1, mRNA; nuclear gene for mitochondrial product
NM_000282.4:c.734C>A		MANE	NM_000282.4:c.734C>A			NG_008768.1:g.178664C>A			NP_000273.2:p.(Ser245Ter)	NC_000013.10:g.100915000C>A	NC_000013.11:g.100262746C>A	13	100915000	.	C	A	13	100262746	.	C	A	PCCA	HGNC:8653	Homo sapiens propionyl-CoA carboxylase subunit alpha (PCCA), transcript variant 1, mRNA; nuclear gene for mitochondrial product
NM_000282.4:c.734C>G		MANE	NM_000282.4:c.734C>G			NG_008768.1:g.178664C>G			NP_000273.2:p.(Ser245Ter)	NC_000013.10:g.100915000C>G	NC_000013.11:g.100262746C>G	13	100915000	.	C	G	13	100262746	.	C	G	PCCA	HGNC:8653	Homo sapiens propionyl-CoA carboxylase subunit alpha (PCCA), transcript variant 1, mRNA; nuclear gene for mitochondrial product
NM_000282.4:c.803G>T		MANE	NM_000282.4:c.803G>T			NG_008768.1:g.178733G>T			NP_000273.2:p.(Arg268Leu)	NC_000013.10:g.100915069G>T	NC_000013.11:g.100262815G>T	13	100915069	.	G	T	13	100262815	.	G	T	PCCA	HGNC:8653	Homo sapiens propionyl-CoA carboxylase subunit alpha (PCCA), transcript variant 1, mRNA; nuclear gene for mitochondrial product
NM_000282.4:c.819+1G>A		MANE	NM_000282.4:c.819+1G>A	NC_000013.10(NM_000282.4):c.819+1G>A	NG_008768.1(NM_000282.4):c.819+1G>A	NG_008768.1:g.178750G>A			NP_000273.2:p.?	NC_000013.10:g.100915086G>A	NC_000013.11:g.100262832G>A	13	100915086	.	G	A	13	100262832	.	G	A	PCCA	HGNC:8653	Homo sapiens propionyl-CoA carboxylase subunit alpha (PCCA), transcript variant 1, mRNA; nuclear gene for mitochondrial product
NM_000282.4:c.819+2T>A		MANE	NM_000282.4:c.819+2T>A	NC_000013.10(NM_000282.4):c.819+2T>A	NG_008768.1(NM_000282.4):c.819+2T>A	NG_008768.1:g.178751T>A			NP_000273.2:p.?	NC_000013.10:g.100915087T>A	NC_000013.11:g.100262833T>A	13	100915087	.	T	A	13	100262833	.	T	A	PCCA	HGNC:8653	Homo sapiens propionyl-CoA carboxylase subunit alpha (PCCA), transcript variant 1, mRNA; nuclear gene for mitochondrial product
NM_000282.4:c.863G>A		MANE	NM_000282.4:c.863G>A			NG_008768.1:g.184650G>A			NP_000273.2:p.(Arg288Lys)	NC_000013.10:g.100920986G>A	NC_000013.11:g.100268732G>A	13	100920986	.	G	A	13	100268732	.	G	A	PCCA	HGNC:8653	Homo sapiens propionyl-CoA carboxylase subunit alpha (PCCA), transcript variant 1, mRNA; nuclear gene for mitochondrial product
NM_000282.4:c.872C>T		MANE	NM_000282.4:c.872C>T			NG_008768.1:g.184659C>T			NP_000273.2:p.(Ser291Leu)	NC_000013.10:g.100920995C>T	NC_000013.11:g.100268741C>T	13	100920995	.	C	T	13	100268741	.	C	T	PCCA	HGNC:8653	Homo sapiens propionyl-CoA carboxylase subunit alpha (PCCA), transcript variant 1, mRNA; nuclear gene for mitochondrial product
NM_000282.4:c.937C>T		MANE	NM_000282.4:c.937C>T			NG_008768.1:g.189136C>T			NP_000273.2:p.(Arg313Ter)	NC_000013.10:g.100925472C>T	NC_000013.11:g.100273218C>T	13	100925472	.	C	T	13	100273218	.	C	T	PCCA	HGNC:8653	Homo sapiens propionyl-CoA carboxylase subunit alpha (PCCA), transcript variant 1, mRNA; nuclear gene for mitochondrial product
NM_000282.4:c.978del		MANE	NM_000282.4:c.978del			NG_008768.1:g.189177del			NP_000273.2:p.(Val327Ter)	NC_000013.10:g.100925513del	NC_000013.11:g.100273259del	13	100925512	.	CA	C	13	100273258	.	CA	C	PCCA	HGNC:8653	Homo sapiens propionyl-CoA carboxylase subunit alpha (PCCA), transcript variant 1, mRNA; nuclear gene for mitochondrial product
NM_000282.4:c.984del		MANE	NM_000282.4:c.984del			NG_008768.1:g.189183del			NP_000273.2:p.(Lys328AsnfsTer23)	NC_000013.10:g.100925519del	NC_000013.11:g.100273265del	13	100925515	.	TA	T	13	100273261	.	TA	T	PCCA	HGNC:8653	Homo sapiens propionyl-CoA carboxylase subunit alpha (PCCA), transcript variant 1, mRNA; nuclear gene for mitochondrial product
NM_000282.4:c.1004T>G		MANE	NM_000282.4:c.1004T>G			NG_008768.1:g.189203T>G			NP_000273.2:p.(Val335Gly)	NC_000013.10:g.100925539T>G	NC_000013.11:g.100273285T>G	13	100925539	.	T	G	13	100273285	.	T	G	PCCA	HGNC:8653	Homo sapiens propionyl-CoA carboxylase subunit alpha (PCCA), transcript variant 1, mRNA; nuclear gene for mitochondrial product
NM_000282.4:c.1079T>G		MANE	NM_000282.4:c.1079T>G			NG_008768.1:g.217391T>G			NP_000273.2:p.(Val360Gly)	NC_000013.10:g.100953727T>G	NC_000013.11:g.100301473T>G	13	100953727	.	T	G	13	100301473	.	T	G	PCCA	HGNC:8653	Homo sapiens propionyl-CoA carboxylase subunit alpha (PCCA), transcript variant 1, mRNA; nuclear gene for mitochondrial product
NM_000282.4:c.1085A>T		MANE	NM_000282.4:c.1085A>T			NG_008768.1:g.217397A>T			NP_000273.2:p.(Glu362Val)	NC_000013.10:g.100953733A>T	NC_000013.11:g.100301479A>T	13	100953733	.	A	T	13	100301479	.	A	T	PCCA	HGNC:8653	Homo sapiens propionyl-CoA carboxylase subunit alpha (PCCA), transcript variant 1, mRNA; nuclear gene for mitochondrial product
NM_000282.4:c.1118T>A		MANE	NM_000282.4:c.1118T>A			NG_008768.1:g.217430T>A			NP_000273.2:p.(Met373Lys)	NC_000013.10:g.100953766T>A	NC_000013.11:g.100301512T>A	13	100953766	.	T	A	13	100301512	.	T	A	PCCA	HGNC:8653	Homo sapiens propionyl-CoA carboxylase subunit alpha (PCCA), transcript variant 1, mRNA; nuclear gene for mitochondrial product
NM_000282.4:c.1147dup		MANE	NM_000282.4:c.1147dup			NG_008768.1:g.217459dup			NP_000273.2:p.(Arg383LysfsTer6)	NC_000013.10:g.100953795dup	NC_000013.11:g.100301541dup	13	100953794	.	C	CA	13	100301540	.	C	CA	PCCA	HGNC:8653	Homo sapiens propionyl-CoA carboxylase subunit alpha (PCCA), transcript variant 1, mRNA; nuclear gene for mitochondrial product
NM_000282.4:c.1185A>C		MANE	NM_000282.4:c.1185A>C			NG_008768.1:g.217497A>C			NP_000273.2:p.(Ala395=)	NC_000013.10:g.100953833A>C	NC_000013.11:g.100301579A>C	13	100953833	.	A	C	13	100301579	.	A	C	PCCA	HGNC:8653	Homo sapiens propionyl-CoA carboxylase subunit alpha (PCCA), transcript variant 1, mRNA; nuclear gene for mitochondrial product
NM_000282.4:c.1187T>A		MANE	NM_000282.4:c.1187T>A			NG_008768.1:g.217499T>A			NP_000273.2:p.(Val396Asp)	NC_000013.10:g.100953835T>A	NC_000013.11:g.100301581T>A	13	100953835	.	T	A	13	100301581	.	T	A	PCCA	HGNC:8653	Homo sapiens propionyl-CoA carboxylase subunit alpha (PCCA), transcript variant 1, mRNA; nuclear gene for mitochondrial product
NM_000282.4:c.1196G>T		MANE	NM_000282.4:c.1196G>T			NG_008768.1:g.217508G>T			NP_000273.2:p.(Arg399Leu)	NC_000013.10:g.100953844G>T	NC_000013.11:g.100301590G>T	13	100953844	.	G	T	13	100301590	.	G	T	PCCA	HGNC:8653	Homo sapiens propionyl-CoA carboxylase subunit alpha (PCCA), transcript variant 1, mRNA; nuclear gene for mitochondrial product
NM_000282.4:c.1210-7C>G		MANE	NM_000282.4:c.1210-7C>G	NC_000013.10(NM_000282.4):c.1210-7C>G	NG_008768.1(NM_000282.4):c.1210-7C>G	NG_008768.1:g.218835C>G			NP_000273.2:p.?	NC_000013.10:g.100955171C>G	NC_000013.11:g.100302917C>G	13	100955171	.	C	G	13	100302917	.	C	G	PCCA	HGNC:8653	Homo sapiens propionyl-CoA carboxylase subunit alpha (PCCA), transcript variant 1, mRNA; nuclear gene for mitochondrial product
NM_000282.4:c.1275T>C		MANE	NM_000282.4:c.1275T>C			NG_008768.1:g.218907T>C			NP_000273.2:p.(His425=)	NC_000013.10:g.100955243T>C	NC_000013.11:g.100302989T>C	13	100955243	.	T	C	13	100302989	.	T	C	PCCA	HGNC:8653	Homo sapiens propionyl-CoA carboxylase subunit alpha (PCCA), transcript variant 1, mRNA; nuclear gene for mitochondrial product
NM_000282.4:c.1284+1G>A		MANE	NM_000282.4:c.1284+1G>A	NC_000013.10(NM_000282.4):c.1284+1G>A	NG_008768.1(NM_000282.4):c.1284+1G>A	NG_008768.1:g.218917G>A			NP_000273.2:p.?	NC_000013.10:g.100955253G>A	NC_000013.11:g.100302999G>A	13	100955253	.	G	A	13	100302999	.	G	A	PCCA	HGNC:8653	Homo sapiens propionyl-CoA carboxylase subunit alpha (PCCA), transcript variant 1, mRNA; nuclear gene for mitochondrial product
NM_000282.4:c.1288C>T		MANE	NM_000282.4:c.1288C>T			NG_008768.1:g.223113C>T			NP_000273.2:p.(Arg430Ter)	NC_000013.10:g.100959449C>T	NC_000013.11:g.100307195C>T	13	100959449	.	C	T	13	100307195	.	C	T	PCCA	HGNC:8653	Homo sapiens propionyl-CoA carboxylase subunit alpha (PCCA), transcript variant 1, mRNA; nuclear gene for mitochondrial product
NM_000282.4:c.1330dup		MANE	NM_000282.4:c.1330dup			NG_008768.1:g.223155dup			NP_000273.2:p.(Tyr444LeufsTer3)	NC_000013.10:g.100959491dup	NC_000013.11:g.100307237dup	13	100959488	.	A	AT	13	100307234	.	A	AT	PCCA	HGNC:8653	Homo sapiens propionyl-CoA carboxylase subunit alpha (PCCA), transcript variant 1, mRNA; nuclear gene for mitochondrial product
NM_000282.4:c.1415dup		MANE	NM_000282.4:c.1415dup			NG_008768.1:g.225812dup			NP_000273.2:p.(Asn472LysfsTer10)	NC_000013.10:g.100962148dup	NC_000013.11:g.100309894dup	13	100962146	.	T	TA	13	100309892	.	T	TA	PCCA	HGNC:8653	Homo sapiens propionyl-CoA carboxylase subunit alpha (PCCA), transcript variant 1, mRNA; nuclear gene for mitochondrial product
NM_000282.4:c.1426C>T		MANE	NM_000282.4:c.1426C>T			NG_008768.1:g.225823C>T			NP_000273.2:p.(Arg476Ter)	NC_000013.10:g.100962159C>T	NC_000013.11:g.100309905C>T	13	100962159	.	C	T	13	100309905	.	C	T	PCCA	HGNC:8653	Homo sapiens propionyl-CoA carboxylase subunit alpha (PCCA), transcript variant 1, mRNA; nuclear gene for mitochondrial product
NM_000282.4:c.1429+2T>C		MANE	NM_000282.4:c.1429+2T>C	NC_000013.10(NM_000282.4):c.1429+2T>C	NG_008768.1(NM_000282.4):c.1429+2T>C	NG_008768.1:g.225828T>C			NP_000273.2:p.?	NC_000013.10:g.100962164T>C	NC_000013.11:g.100309910T>C	13	100962164	.	T	C	13	100309910	.	T	C	PCCA	HGNC:8653	Homo sapiens propionyl-CoA carboxylase subunit alpha (PCCA), transcript variant 1, mRNA; nuclear gene for mitochondrial product
NM_000282.4:c.1540+2T>C		MANE	NM_000282.4:c.1540+2T>C	NC_000013.10(NM_000282.4):c.1540+2T>C	NG_008768.1(NM_000282.4):c.1540+2T>C	NG_008768.1:g.246591T>C			NP_000273.2:p.?	NC_000013.10:g.100982927T>C	NC_000013.11:g.100330673T>C	13	100982927	.	T	C	13	100330673	.	T	C	PCCA	HGNC:8653	Homo sapiens propionyl-CoA carboxylase subunit alpha (PCCA), transcript variant 1, mRNA; nuclear gene for mitochondrial product
NM_000282.4:c.1593_1595del		MANE	NM_000282.4:c.1593_1595del			NG_008768.1:g.256127_256129del			NP_000273.2:p.(Leu532del)	NC_000013.10:g.100992463_100992465del	NC_000013.11:g.100340209_100340211del	13	100992462	.	CATT	C	13	100340208	.	CATT	C	PCCA	HGNC:8653	Homo sapiens propionyl-CoA carboxylase subunit alpha (PCCA), transcript variant 1, mRNA; nuclear gene for mitochondrial product
NM_000282.4:c.1676G>T		MANE	NM_000282.4:c.1676G>T			NG_008768.1:g.284422G>T			NP_000273.2:p.(Trp559Leu)	NC_000013.10:g.101020758G>T	NC_000013.11:g.100368504G>T	13	101020758	.	G	T	13	100368504	.	G	T	PCCA	HGNC:8653	Homo sapiens propionyl-CoA carboxylase subunit alpha (PCCA), transcript variant 1, mRNA; nuclear gene for mitochondrial product
NM_000282.4:c.1746G>C		MANE	NM_000282.4:c.1746G>C			NG_008768.1:g.284492G>C			NP_000273.2:p.(Ser582=)	NC_000013.10:g.101020828G>C	NC_000013.11:g.100368574G>C	13	101020828	.	G	C	13	100368574	.	G	C	PCCA	HGNC:8653	Homo sapiens propionyl-CoA carboxylase subunit alpha (PCCA), transcript variant 1, mRNA; nuclear gene for mitochondrial product
NM_000282.4:c.1831C>T		MANE	NM_000282.4:c.1831C>T			NG_008768.1:g.341635C>T			NP_000273.2:p.(Gln611Ter)	NC_000013.10:g.101077971C>T	NC_000013.11:g.100425717C>T	13	101077971	.	C	T	13	100425717	.	C	T	PCCA	HGNC:8653	Homo sapiens propionyl-CoA carboxylase subunit alpha (PCCA), transcript variant 1, mRNA; nuclear gene for mitochondrial product
NM_000282.4:c.1863del		MANE	NM_000282.4:c.1863del			NG_008768.1:g.365187del			NP_000273.2:p.(Gly622ValfsTer4)	NC_000013.10:g.101101523del	NC_000013.11:g.100449269del	13	101101522	.	CA	C	13	100449268	.	CA	C	PCCA	HGNC:8653	Homo sapiens propionyl-CoA carboxylase subunit alpha (PCCA), transcript variant 1, mRNA; nuclear gene for mitochondrial product
NM_000282.4:c.2002G>A		MANE	NM_000282.4:c.2002G>A			NG_008768.1:g.431447G>A			NP_000273.2:p.(Gly668Arg)	NC_000013.10:g.101167783G>A	NC_000013.11:g.100515529G>A	13	101167783	.	G	A	13	100515529	.	G	A	PCCA	HGNC:8653	Homo sapiens propionyl-CoA carboxylase subunit alpha (PCCA), transcript variant 1, mRNA; nuclear gene for mitochondrial product
NM_000282.4:c.1961T>A		MANE	NM_000282.4:c.1961T>A			NG_008768.1:g.431406T>A			NP_000273.2:p.(Val654Glu)	NC_000013.10:g.101167742T>A	NC_000013.11:g.100515488T>A	13	101167742	.	T	A	13	100515488	.	T	A	PCCA	HGNC:8653	Homo sapiens propionyl-CoA carboxylase subunit alpha (PCCA), transcript variant 1, mRNA; nuclear gene for mitochondrial product
NM_000282.4:c.2149_2157dup		MANE	NM_000282.4:c.2149_2157dup			NG_008768.1:g.446046_446054dup			NP_000273.2:p.(Thr717_Gly719dup)	NC_000013.10:g.101182382_101182390dup	NC_000013.11:g.100530128_100530136dup	13	101182381	.	C	CACAGTTGGA	13	100530127	.	C	CACAGTTGGA	PCCA	HGNC:8653	Homo sapiens propionyl-CoA carboxylase subunit alpha (PCCA), transcript variant 1, mRNA; nuclear gene for mitochondrial product
NC_000013.10:g.(100755215_100764094)_(100764316_100807232)	Uncertain positions are not currently supported	None
NC_000013.10:g.(100807347_100809540)_(100809595_100861585)	Uncertain positions are not currently supported	None
NC_000013.10:g.(100888133_100909848)_(101167822_101179928)	Uncertain positions are not currently supported	None
NC_000013.10:g.(100992514_101020725)_(101020829_101077886)	Uncertain positions are not currently supported	None
